# Supplementary material for: High-pressure phase transition of AB3-type compounds: case of tellurium trioxide
Source: Royal Society of Chemistry journal article supplement (doi:10.1039/d1ra02344f), 2021-01-01
Supplement: d1ra02344f1.pdf [file d1ra02344f1.pdf]

## ELECTRONIC SUPPLEMENTARY INFORMATION

### High-pressure phase transition of AB<sub>3</sub>-type compounds: case of tellurium trioxide

Dominik Kurzydłowski,<sup>1</sup> Mikhail A. Kuzovnikov,<sup>2</sup> Marek Tkacz<sup>3</sup>

<sup>1</sup> Faculty of Mathematics and Natural Sciences, Cardinal Stefan Wyszyński University, Warsaw 01-038, Poland;

<sup>2</sup> Institute of Solid State Physics RAS, 142432 Chernogolovka, Moscow District, Russian Federation;

<sup>3</sup> Institute of Physical Chemistry, Polish Academy of Sciences, Warsaw 01-224, Poland.

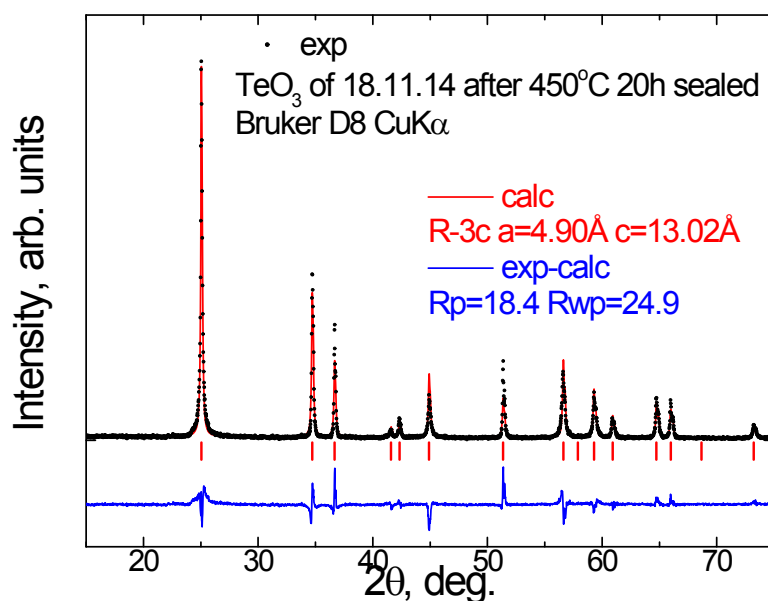

**Figure S 1** Powder X-ray diffraction pattern of freshly synthesized TeO<sub>3</sub> (black points) obtained using Bruker D8 diffractometer and CuK $\alpha$  radiation. The Rietveld fit assuming the R $\bar{3}$ c structure is shown with a red curve. Blue curve represents the difference between the fit and experimental points.

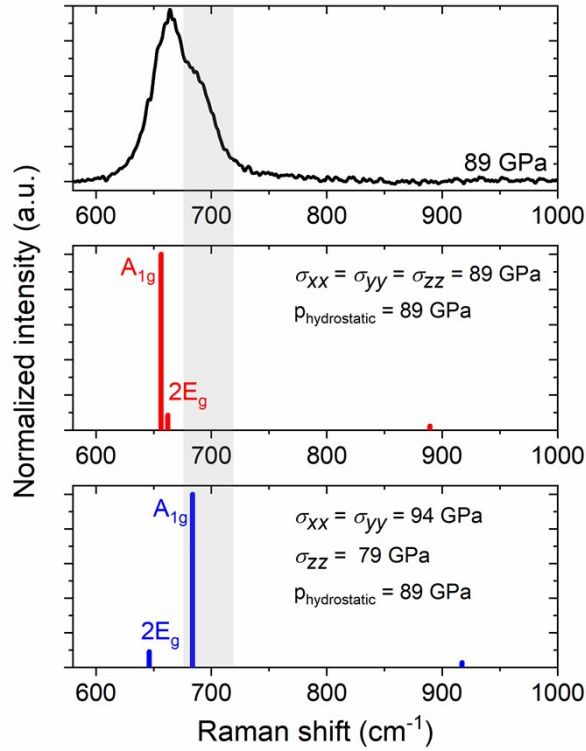

**Figure S 2** Raman spectrum (black curve) of  $\text{TeO}_3$  at 89 GPa compared with the Raman band intensities simulated with LDA for the  $R\bar{3}c$  structure at a hydrostatic pressure of 89 GPa (red bars), and at non-hydrostatic conditions (blue bars). Diagonal elements of the stress tensor ( $\sigma_{xx}$ ,  $\sigma_{yy}$ ,  $\sigma_{zz}$ ), under which the geometry optimization of the  $R\bar{3}c$  structure were conducted are also specified. These values were selected as reasonable parameters for non-hydrostatic conditions inside the DAC (deviatoric stress of 5 GPa). We note that the shift of the  $A_{1g}$  mode to higher frequencies (with respect to hydrostatic conditions) requires the stress component along the  $x$  and  $y$  directions to be larger than that along the  $z$  direction

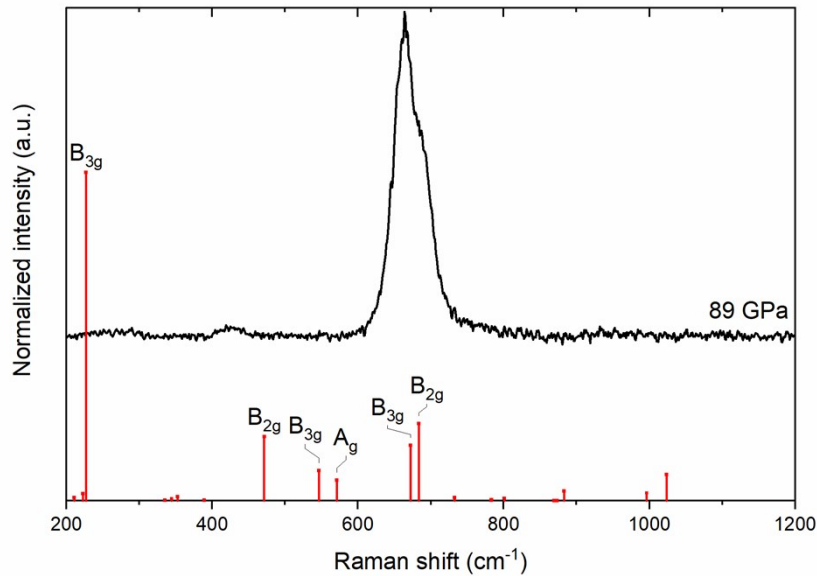

**Figure S 3** Comparison of the Raman spectrum of  $\text{TeO}_3$  at 89 GPa (black curves) with the Raman intensities simulated at that pressure for the  $\text{YF}_3$ -type ( $Pnma$  symmetry) structure (red bars).

**Table S 1** Comparison of the experimental geometry (from this work and ref. <sup>1</sup>) and the frequencies of the Raman-active vibrational modes (this work and ref. <sup>2</sup>) of the ambient pressure polymorph of TeO<sub>3</sub> (space group  $R\bar{3}c$ ) with data obtained from calculations utilizing the SCAN and LDA functionals. Cell vectors and the Te-O bond length are given in Å, volume in Å<sup>3</sup>, while frequencies in cm<sup>-1</sup>. Percentage differences between our experimental data and calculations are given in parenthesis.

|                         | Exp.   | Exp. (this work) | SCAN (this work) | LDA (this work) |
|-------------------------|--------|------------------|------------------|-----------------|
| <b>a</b>                | 4.901  | 4.900            | 4.933 (+0.7 %)   | 4.959 (+1.2 %)  |
| <b>c</b>                | 13.030 | 13.020           | 13.074 (+0.4 %)  | 13.314 (+2.3 %) |
| <b>V/Z</b>              | 45.17  | 45.12            | 45.91 (+1.8 %)   | 47.25 (+4.7 %)  |
| <b>R<sub>Te-O</sub></b> | 1.911  | 1.910            | 1.917 (+0.4 %)   | 1.975 (+3.4 %)  |
| <b>1E<sub>g</sub></b>   | 258    | 255              | 255 (-0.0 %)     | 251 (-1.6 %)    |
| <b>A<sub>g</sub></b>    | 336    | 334              | 333 (-0.3 %)     | 360 (+7.8 %)    |
| <b>2E<sub>g</sub></b>   | 485    | 484              | 476 (-1.7 %)     | 457 (-5.6 %)    |
| <b>3E<sub>g</sub></b>   | 666    | 677              | 655 (-3.2 %)     | 624 (-7.8 %)    |

**Table S 2** Comparison of the calculated phase transition pressure (in GPa) between the VF<sub>3</sub>-type structure ( $R\bar{3}c$  symmetry) and the YF<sub>3</sub>-type structure ( $Pnma$  symmetry).

| LDA | PBE | SCAN | HSE06 |
|-----|-----|------|-------|
| 46  | 55  | 66   | 71    |

**Table S 3** Computed (SCAN calculations) structural parameters of the high-pressure polymorphs of TeO<sub>3</sub>.

|                                                                      | <b>a</b> | <b>b</b> | <b>c</b> | <b>α</b> | <b>β</b> | <b>γ</b> | <b>V</b> | <b>Fractional coordinates</b>                                                                                                                                     |
|----------------------------------------------------------------------|----------|----------|----------|----------|----------|----------|----------|-------------------------------------------------------------------------------------------------------------------------------------------------------------------|
| <b>VF<sub>3</sub> (<math>R\bar{3}c</math>)</b><br><b>p = 60 GPa</b>  | 4.412    | 4.412    | 12.561   | 90       | 90       | 120      | 211.78   | O1 18e (0.685 0.0 0.25)<br>Te1 6b (0.0 0.0 0.0)                                                                                                                   |
| <b>HP-WO<sub>3</sub> (<math>P2_1/c</math>)</b><br><b>p = 110 GPa</b> | 4.809    | 4.343    | 5.857    | 90       | 96.15    | 90       | 121.61   | O1 4e (0.052 0.663 0.846)<br>O2 4e (0.615 0.0146 0.347)<br>O3 4e (0.724 0.509 0.455)<br>Te1 4e (0.743 0.683 0.161)                                                |
| <b>YF<sub>3</sub> (<math>Pnma</math>)</b><br><b>p = 100 GPa</b>      | 4.888    | 5.960    | 4.074    | 90       | 90       | 90       | 118.69   | O1 8d 0.670 0.065 0.153)<br>O2 4c (0.525 0.25 0.623)<br>Te1 4c (0.871 0.250.465)                                                                                  |
| <b><math>R\bar{3}</math></b><br><b>p = 100 GPa</b>                   | 5.851    | 5.851    | 17.358   | 90       | 90       | 120      | 514.77   | O1 18f(0.352 0.376 0.303)<br>O2 18f(0.745 -0.027 0.186)<br>O3 6c (0.0 0.0 0.715)<br>O4 6c (0.0 0.0 0.437)<br>O5 6c (0.0 0.0 -0.074)<br>Te1 18f(0.003 0.326 0.251) |

## References

- 1 M. Dušek and J. Loub, *Powder Diffr.*, 1988, **3**, 175–176.
- 2 J. Loub, *Collect. Czechoslov. Chem. Commun.*, 1977, **42**, 960–966.
